# Supplementary material for: Using alcohols as alkylation reagents for 4-cyanopyridinium and N,N′-dialkyl-4,4′-bipyridinium and their one-dimensional iodoplumbates
Source: Royal Society of Chemistry journal article supplement (doi:10.1039/c0ce00309c), 2010-09-06
Supplement: c0ce00309c.pdf [file c0ce00309c.pdf]

## Supporting Information

### Using alcohols as alkylation reagents for 4-cyanopyridinium and N,N'-dialkyl-4,4'-bipyridinium and their one-dimensional iodoplumbates

Yang Chen,<sup>a</sup> Zhou Yang,<sup>a</sup> Cheng-Xin Guo,<sup>a</sup> Chun-Yan Ni,<sup>a</sup> Hong-Xi Li,<sup>a</sup> Zhi-Gang Ren<sup>a</sup> and Jian-Ping Lang<sup>\*ab</sup>

<sup>a</sup>College of Chemistry, Chemical Engineering and Materials Science, Suzhou University, 199 RenAi Road, Suzhou 215123, Jiangsu, China

<sup>b</sup>State Key Laboratory of Organometallic Chemistry, Shanghai Institute of Organic Chemistry, Chinese Academy of Sciences, Shanghai 200032, China

Fax: (+86)512-6588-0089

E-mail: [jplang@suda.edu.cn](mailto:jplang@suda.edu.cn)

## Contents

|                  |                                                                                     |    |
|------------------|-------------------------------------------------------------------------------------|----|
| <b>Scheme S1</b> | The possible mechanisms on generating complexes <b>1–8</b> .....                    | S3 |
| <b>Fig. S1</b>   | 3D packing diagrams of complexes <b>2</b> and <b>4</b> .....                        | S4 |
| <b>Fig. S2</b>   | 3D packing diagram of complex <b>5</b> .....                                        | S4 |
| <b>Fig. S3</b>   | 3D packing diagram of complex <b>7</b> .....                                        | S4 |
| <b>Fig. S4</b>   | Frequency dependence of permittivity (imaginary part) of complexes <b>1–8</b> ..... | S5 |

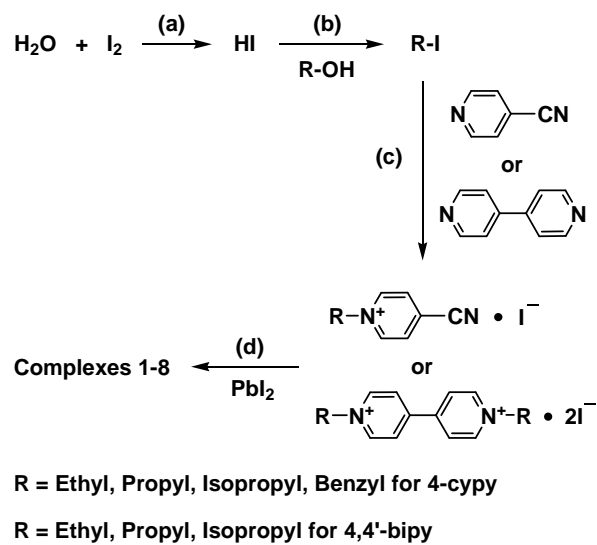

**Scheme S1** The possible mechanisms on generating complexes **1-8** with  $\text{C}^+/\text{C}^{2+}$  and  $\text{V}^{2+}$  cations.

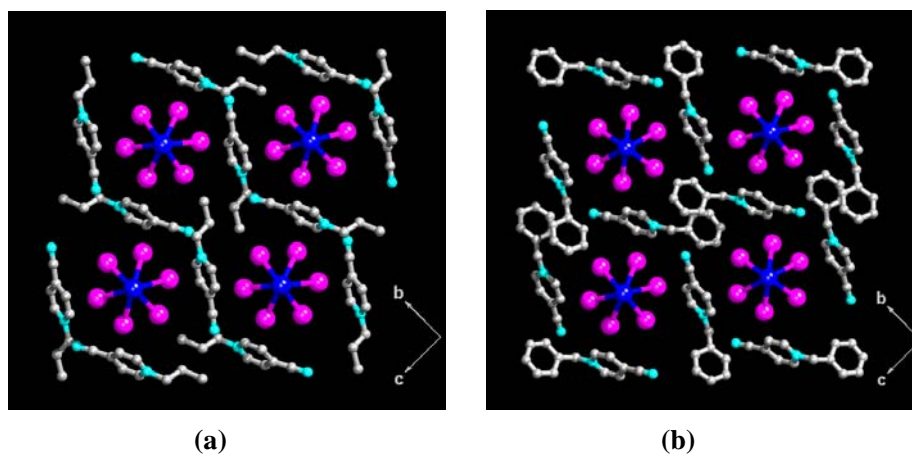

**Fig. S1** 3D packing diagrams of **2** (a) and **4** (b) looking down along *a*-axis. Atom color codes: C, gray; N, cyan; Pb, blue; I, pink (the same hereinafter). H atoms are omitted for clarity.

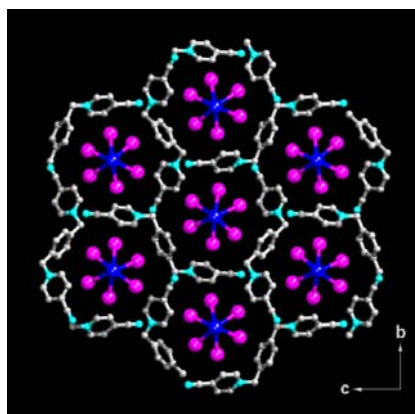

**Fig. S2** 3D packing diagram of **5** looking down along *a*-axis. H atoms are omitted for clarity.

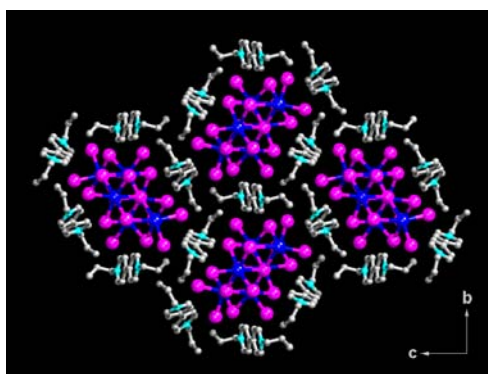

**Fig. S3** 3D packing diagram of **7** looking down along *a*-axis. H atoms are omitted for clarity.

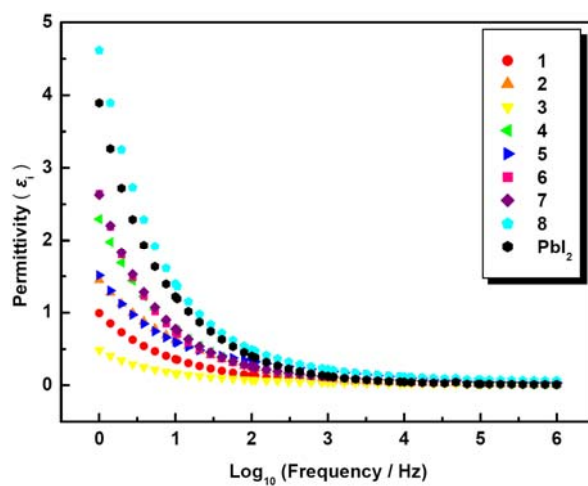

**Fig. S4** Frequency dependence of permittivity (imaginary part) of **1–8** at 298 K.
